# Supplementary material for: Metabolite Profiling and Transcriptome Analysis Unveil the Mechanisms of Red-Heart Chinese Fir [Cunninghamia lanceolata (Lamb.) Hook] Heartwood Coloration
Source: Front Plant Sci. 2022 Apr 1;13:854716. doi: 10.3389/fpls.2022.854716 (PMC9022624; doi:10.3389/fpls.2022.854716)
Supplement: Supplementary file 3 [file Table_3.XLSX]

## Sheet: Sheet1
Supplementary Table 3. The index of top 10 VIP values of up-regulated and down-regulated metabolites respectively marked in volcano plot
	SW	TZ	OHW	IHW
up-regulated	Hmtn001120	Lmbp002309	Lmlp003161	Hmjp003008
	pme1194	Xmyn004302	mws0147	Zmhn001793
	pma0702	Lmmn001552	Hmjp003008	pme1540
	Lmmn001552	pmb1562	pmp001220	pme3200
	mws0191	pma0149	pme0122	mws0147
	mws1050	Hmsn002598	mws0089	Lmmn006306
	Lmqn000432	Zmhn000892	pmn001378	mws0959
	mws0216	pmp000907	Lmjp003402	pme3131
	pmb0962	Lmlp005236	Hmcp004865	pmb3142
	Cmyp007180	Lmhp011549	Hmtn001120	pmb2871
down-regulated	pme2743	Lmhn003240	mws0898	pme0008
	mws4167	mws0355	mws0724	mws1195
	mws0355	pmf0249	mws0355	pmb2654
	Lmdp003146	mws4167	Lmmp003271	Lmhp002001
	mws0096	HJN087	Li512113	Zmhn003082
	Lmyp004084	pmb2970	Lmbn000198	mws2623
	Hmlp003129	Lmhn002629	Lmbn005287	pmp000001
	pmb2970	Lmmn003748	Zmgn000503	Zmhn003297
	mws1686	Hmgn004693	mws0376	pmb3081
	Hmln001931	HJN012	mws0275	pme3163
